# Supplementary material for: Temporal Trends and Differences in Sexuality among Depressed and Non-Depressed Adults in the United States
Source: MDPI journal article supplement (doi:10.3390/ijerph192114010), 2022-10-27
Supplement: s1 [file s1]

**TableS1 Differences between Depressed and Non-depressed in 2005-2008**

| <b>2005-2008</b>                                       | <b>Depressed<br/>(N=1742)</b> | <b>Non-Depressed<br/>(N=5322)</b> | <b>Depressed VS.<br/>Non-Depressed</b> |
|--------------------------------------------------------|-------------------------------|-----------------------------------|----------------------------------------|
| <b>Age (Y)</b>                                         | 38.66(37.94-39.38)            | 38.45(37.95-38.95)                |                                        |
| <b>Female(%)</b>                                       | 59.99                         | 48.95                             |                                        |
| <b>Age group(%)</b>                                    |                               |                                   |                                        |
| 18-38(Y)                                               | 46.17(42.87-49.46)            | 49.77(47.85-51.69)                |                                        |
| 39-59(Y)                                               | 53.83(50.54-57.13)            | 50.23(48.31-52.15)                |                                        |
| <b>Race/Ethnicity (%)</b>                              |                               |                                   |                                        |
| Non-Hispanic White                                     | 65.30(59.99-70.62)            | 68.99(64.35-73.63)                |                                        |
| Non-Hispanic Black                                     | 13.19(10.01-16.36)            | 11.67(8.71-14.63)                 |                                        |
| Hispanic                                               | 15.62(11.96-19.27)            | 13.67(11.13-16.21)                |                                        |
| Others                                                 | 5.89(4.41-7.38)               | 5.67(4.41-6.93)                   |                                        |
| <b>Marital Status (%)</b>                              |                               |                                   |                                        |
| Living Together                                        | 55.60(51.22-59.97)            | 65.39(62.92-67.87)                |                                        |
| Living Alone                                           | 42.05(37.78-46.32)            | 32.28(29.80-34.75)                |                                        |
| <b>Employment Status (%)</b>                           |                               |                                   |                                        |
| Employed                                               | 63.14(59.26-67.02)            | 81.47(79.82-83.12)                |                                        |
| Unemployed                                             | 36.86(32.98-40.74)            | 18.52(16.87-20.17)                |                                        |
| <b>Education Status (%)</b>                            |                               |                                   |                                        |
| Some college or Above                                  | 47.75(43.77-51.73)            | 59.63(56.28-62.98)                |                                        |
| High school graduate or<br>GED                         | 25.75(22.89-28.60)            | 21.89(20.14-23.64)                |                                        |
| Below High School                                      | 22.08(18.82-25.35)            | 13.87(11.79-15.95)                |                                        |
| <b>Family Income Status (%)</b>                        |                               |                                   |                                        |
| PIR <1.30                                              | 28.30(24.83-31.78)            | 15.79(13.94-17.65)                |                                        |
| PIR: 1.30-3.50                                         | 33.82(30.42-37.22)            | 30.99(28.53-33.45)                |                                        |
| PIR ≥3.50                                              | 32.57(28.37-36.77)            | 49.05(45.41-52.69)                |                                        |
| <b>Average Age of First<br/>Sexual Intercourse (Y)</b> | 16.65(16.31-16.98)            | 17.59(17.35-17.82)                | -0.94(-1.30--0.58)                     |
| <b>Normal Frequency of<br/>Sexual Activity (%)</b>     | 24.98(22.49-27.48)            | 28.73(26.96-30.50)                | -3.75(-6.77--0.73)                     |
| <b>Heterosexual Sexual<br/>Orientation (%)</b>         | 62.88(59.77-65.98)            | 70.89(69.01-72.77)                | -8.01(-11.60--4.43)                    |

GED: General Educational Development; PIR, Poverty Impact Ratio. Values are mean for continuous variables and percentage for categorical variables; Values in the brackets represent the confidence interval of the corresponding variables.

TableS2 Differences between Depressed and Non-depressed in 2009-2012

| 2009-2012                                              | Depressed<br>(N=1921) | Non-Depressed<br>(N=5253) | Depressed VS.<br>Non-Depressed |
|--------------------------------------------------------|-----------------------|---------------------------|--------------------------------|
| <b>Age (Y)</b>                                         | 39.01(38.41-39.61)    | 38.54(37.67-39.40)        |                                |
| <b>Female(%)</b>                                       | 58.3                  | 46.49                     |                                |
| <b>Age group(%)</b>                                    |                       |                           |                                |
| 18-38(Y)                                               | 46.36(43.79-48.93)    | 48.86(45.55-52.18)        |                                |
| 39-59(Y)                                               | 53.64(51.07-56.21)    | 51.14(47.82-54.45)        |                                |
| <b>Race/Ethnicity (%)</b>                              |                       |                           |                                |
| Non-Hispanic White                                     | 62.76(56.39-69.12)    | 65.06(59.64-70.48)        |                                |
| Non-Hispanic Black                                     | 13.77(9.95-17.59)     | 11.47(9.11-13.84)         |                                |
| Hispanic                                               | 16.84(12.30-21.38)    | 15.67(11.52-19.82)        |                                |
| Others                                                 | 6.63(4.89-8.38)       | 7.79(6.22-9.37)           |                                |
| <b>Marital Status (%)</b>                              |                       |                           |                                |
| Living Together                                        | 49.90(47.45-52.34)    | 61.60(58.60-64.59)        |                                |
| Living Alone                                           | 45.03(42.08-47.98)    | 33.87(31.34-36.40)        |                                |
| <b>Employment Status (%)</b>                           |                       |                           |                                |
| Employed                                               | 57.96(54.50-61.41)    | 76.45(74.44-78.45)        |                                |
| Unemployed                                             | 42.04(38.59-45.50)    | 23.52(21.53-25.52)        |                                |
| <b>Education Status (%)</b>                            |                       |                           |                                |
| Some college or Above                                  | 51.55(46.47-56.62)    | 62.89(59.92-65.86)        |                                |
| High school graduate or<br>GED                         | 23.34(19.89-26.79)    | 19.10(17.37-20.84)        |                                |
| Below High School                                      | 20.16(17.63-22.70)    | 13.40(11.13-15.67)        |                                |
| <b>Family Income Status (%)</b>                        |                       |                           |                                |
| PIR <1.30                                              | 34.23(30.19-38.28)    | 19.54(16.74-22.33)        |                                |
| PIR: 1.30-3.50                                         | 34.76(31.57-37.95)    | 31.17(28.40-33.94)        |                                |
| PIR ≥3.50                                              | 24.94(21.38-28.51)    | 43.17(39.50-46.85)        |                                |
| <b>Average Age of First<br/>Sexual Intercourse (Y)</b> | 16.42(16.15-16.69)    | 17.39(17.20-17.58)        | -0.97(-1.30--0.64)             |
| <b>Normal Frequency of<br/>Sexual Activity (%)</b>     | 25.07(22.36-27.77)    | 31.50(29.69-33.30)        | -6.43(-9.64--3.22)             |
| <b>Heterosexual Sexual<br/>Orientation (%)</b>         | 66.69(64.07-69.32)    | 78.28(76.33-80.22)        | -11.59(-14.81--8.36)           |

GED: General Educational Development; PIR, Poverty Impact Ratio. Values are mean for continuous variables and percentage for categorical variables; Values in the brackets represent the confidence interval of the corresponding variables.

**TableS3 Differences between Depressed and Non-depressed in 2013-2016**

| <b>2013-2016</b>                                       | <b>Depressed<br/>(N=1769)</b> | <b>Non-Depressed<br/>(N=5430)</b> | <b>Depressed VS.<br/>Non-Depressed</b> |
|--------------------------------------------------------|-------------------------------|-----------------------------------|----------------------------------------|
| <b>Age (Y)</b>                                         | 39.45(38.48-51.20)            | 38.34(37.80-38.87)                |                                        |
| <b>Female(%)</b>                                       | 61.67                         | 48.36                             |                                        |
| <b>Age group(%)</b>                                    |                               |                                   |                                        |
| 18-38(Y)                                               | 47.31(43.43-51.20)            | 50.50(48.16-52.83)                |                                        |
| 39-59(Y)                                               | 52.69(48.80-56.57)            | 49.50(47.17-51.84)                |                                        |
| <b>Race/Ethnicity (%)</b>                              |                               |                                   |                                        |
| Non-Hispanic White                                     | 61.16(55.29-67.03)            | 61.52(55.85-67.19)                |                                        |
| Non-Hispanic Black                                     | 13.11(9.70-16.53)             | 11.59(8.78-14.39)                 |                                        |
| Hispanic                                               | 16.78(13.49-20.07)            | 17.89(13.55-22.22)                |                                        |
| Others                                                 | 8.95(6.86-11.03)              | 9.00(7.51-10.50)                  |                                        |
| <b>Marital Status (%)</b>                              |                               |                                   |                                        |
| Living Together                                        | 50.69(47.43-53.95)            | 64.24(62.01-66.46)                |                                        |
| Living Alone                                           | 45.19(42.10-48.28)            | 31.49(29.29-33.69)                |                                        |
| <b>Employment Status (%)</b>                           |                               |                                   |                                        |
| Employed                                               | 61.31(57.37-65.26)            | 79.59(77.52-81.66)                |                                        |
| Unemployed                                             | 38.66(34.71-42.61)            | 20.30(18.22-22.38)                |                                        |
| <b>Education Status (%)</b>                            |                               |                                   |                                        |
| Some college or Above                                  | 56.38(52.58-60.18)            | 65.01(61.43-68.60)                |                                        |
| High school graduate or<br>GED                         | 22.59(19.28-25.89)            | 18.75(16.75-20.75)                |                                        |
| Below High School                                      | 16.98(14.25-19.71)            | 11.97(9.75-14.20)                 |                                        |
| <b>Family Income Status (%)</b>                        |                               |                                   |                                        |
| PIR <1.30                                              | 32.05(28.09-36.00)            | 19.64(16.56-22.73)                |                                        |
| PIR: 1.30-3.50                                         | 35.11(31.11-39.11)            | 31.82(29.86-33.79)                |                                        |
| PIR ≥3.50                                              | 26.78(23.27-30.29)            | 42.60(38.40-46.80)                |                                        |
| <b>Average Age of First<br/>Sexual Intercourse (Y)</b> | 16.46(16.23-16.69)            | 17.43(17.22-17.63)                | -0.97(-1.22--0.72)                     |
| <b>Normal Frequency of<br/>Sexual Activity (%)</b>     | 26.38(24.27-28.50)            | 30.46(28.17-32.74)                | -4.07(-7.15--1.00)                     |
| <b>Heterosexual Sexual<br/>Orientation (%)</b>         | 68.48(64.51-72.45)            | 77.49(76.05-78.94)                | -9.01(-13.18--4.84)                    |

GED: General Educational Development; PIR, Poverty Impact Ratio. Values are mean for continuous variables and percentage for categorical variables; Values in the brackets represent the confidence interval of the corresponding variables.
